# Supplementary material for: Effects of transcutaneous electrical nerve stimulation (TENS) on proinflammatory cytokines: protocol for systematic review
Source: PubMed Central journal article supplement (PMC5505047; doi:10.1186/s13643-017-0532-5), 2017-07-11
Supplement: 13643_2017_532_MOESM5_ESM.pdf [file 13643_2017_532_MOESM5_ESM.pdf]

Additional file 5: Search strategy from Physiotherapy Evidence Database – *PEDro*

| Database: Physiotherapy Evidence Database – PEDro |                                                                      |
|---------------------------------------------------|----------------------------------------------------------------------|
| <b>Descriptors</b>                                |                                                                      |
| <b>#1</b>                                         | Choose the option # Advanced search #                                |
| <b>#2</b>                                         | Abstract & Title: <i>Transcutaneous electrical nerve stimulation</i> |
| <b>#3</b>                                         | Therapy: select “ <i>electrotherapies, heat, cold</i> ”              |
| <b>#4</b>                                         | Problem: <i>not select anything</i>                                  |
| <b>#5</b>                                         | Body Part: <i>not select anything</i>                                |
| <b>#6</b>                                         | Subdiscipline: <i>not select anything</i>                            |
| <b>#7</b>                                         | Topic: select “ <i>no appropriate value in this field</i> ”          |
| <b>#8</b>                                         | Method: select “ <i>clinical trial</i> ”                             |
| <b>#9</b>                                         | # When searching: (x) match all search terms (AND)#                  |
